# Supplementary material for: Altered Profile of E1-S Transporters in Endometrial Cancer: Lower Protein Levels of ABCG2 and OSTβ and Up-Regulation of SLCO1B3 Expression
Source: PubMed Central journal article supplement (PMC8067723; doi:10.3390/ijms22083819), 2021-04-07
Supplement: ijms-22-03819-s001.pdf [file ijms-22-03819-s001.pdf]

# Supplementary Materials: Altered Profile of E1-S Transporters in Endometrial Cancer: Lower Protein Levels of ABCG2 and OST $\beta$ and Up-Regulation of *SLCO1B3* Expression

Renata Pavlič, Suzana Vidic, Maja Anko, Tamara Knific, Tomaž Büdefeld, Kristina Marton, Maša Sinreih, Stefan Poschner, Walter Jäger, Snježana Frković-Grazio and Tea Lanišnik Rižner

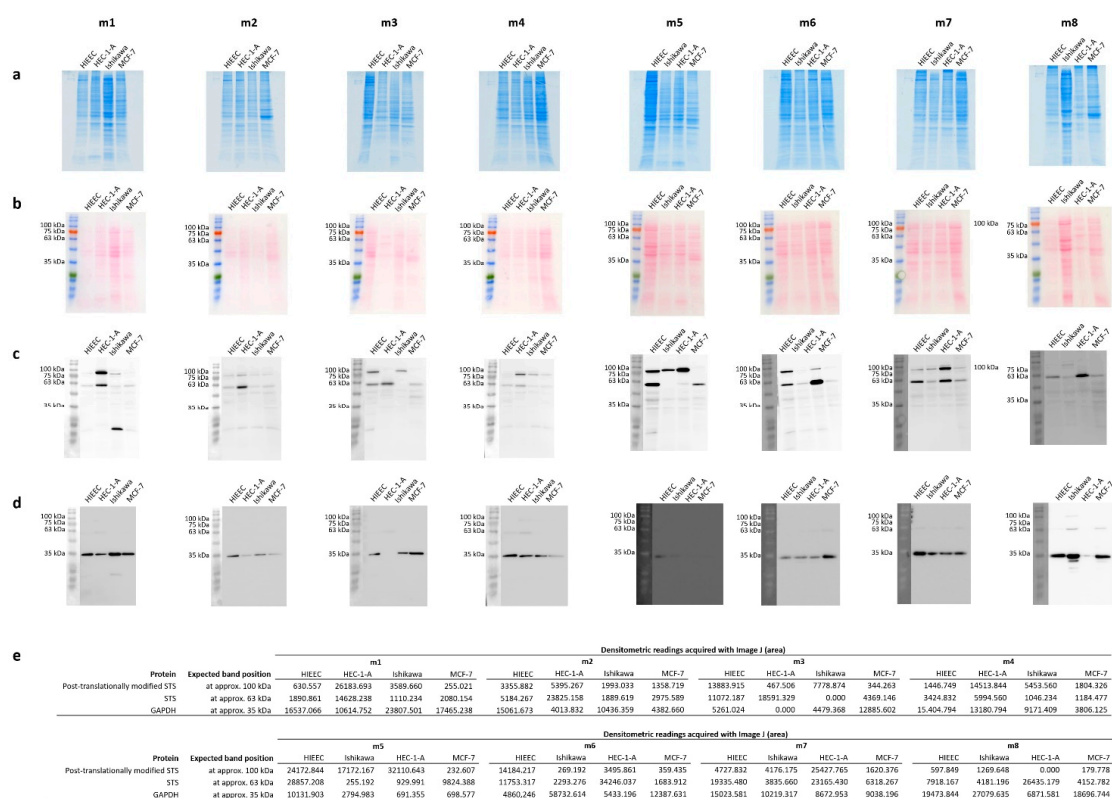

**Figure S1.** Uncropped gels and blots in Western blot detection of STS and GAPDH. a) Gels after staining with Coomassie brilliant blue, b) full-length membranes after staining with Ponceau S, c) full-length membranes after chemiluminescent detection of STS, d) full-length membranes after chemiluminescent detection of GAPDH, e) densitometric readings for quantification acquired with programme Image J. Membrane 7 (m7) was chosen as representative membrane of STS levels in investigated cell lines.

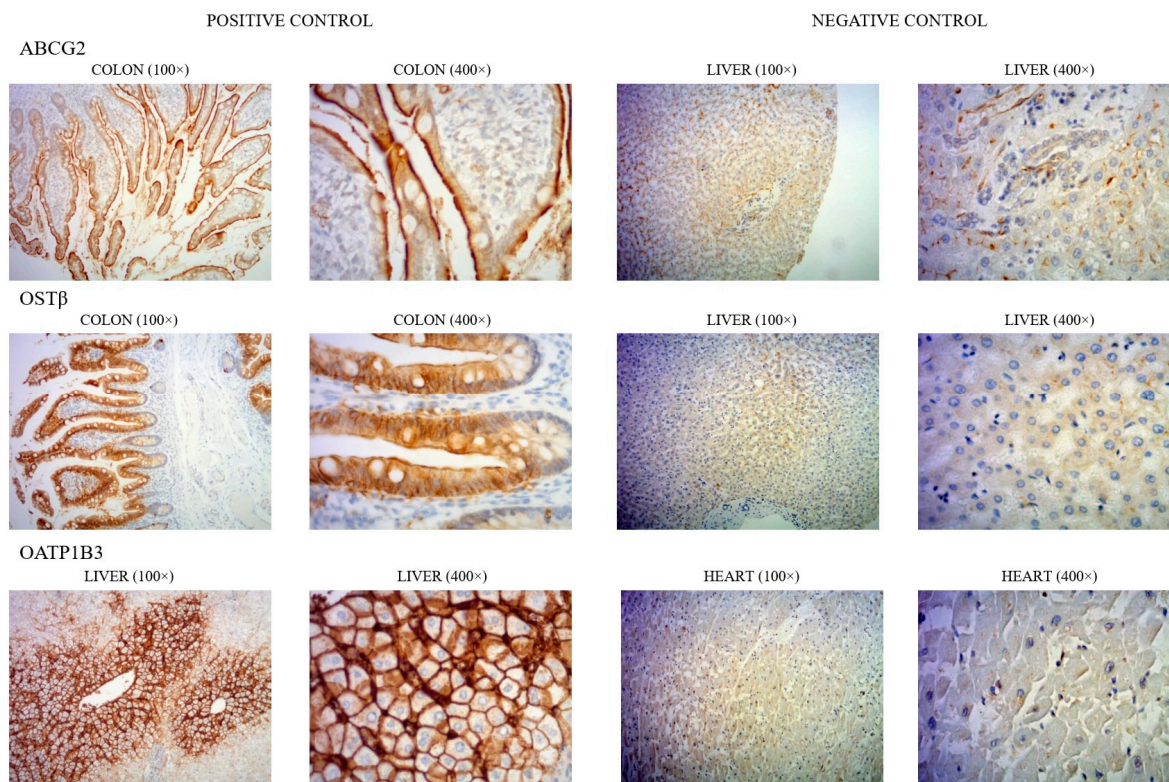

**Figure S2.** Positive and negative controls for anti-ABCG2, anti-OST $\beta$ , and anti-OATP1B3 antibodies, used in immunohistochemical staining.

**Table S1.** Technical conditions for immunohistochemical staining.

| Primary antibody | Pre-treatment | Pre-treatment (min) | Primary antibody dilution | Primary antibody incubation (min) | Antibody diluent | Primary antibody incubation temperature (°C) | Detection kit | Thickness |
|------------------|---------------|---------------------|---------------------------|-----------------------------------|------------------|----------------------------------------------|---------------|-----------|
| ABCG2            | CC1           | 48                  | 1:50                      | 60                                | TTBS             | 37                                           | OptiView      | 4 $\mu$ m |
| OST $\beta$      | CC1           | 48                  | 1:100                     | 60                                | TTBS             | 37                                           | OptiView      | 4 $\mu$ m |
| OATP1B3          | CC1           | 72                  | 1:50                      | 120                               | TBS              | 37                                           | OptiView      | 4 $\mu$ m |

IHC was performed on the Ventana BenchMark ULTRA platform. CC1 – Cell Conditioning Solution 1 (Tris-based buffer, pH 8.5), TBS – Tris-Buffered Saline, TTBS – Tween-Tris-Buffered Saline.

**Table S2.** Normalized expression of evaluated genes in model cell lines and tissue samples evaluated using qPCR.

| gene            | HIEEC     |           | Ishikawa  |           | HEC-1-A    |            | Normal tissue |           | Tumor tissue |             |
|-----------------|-----------|-----------|-----------|-----------|------------|------------|---------------|-----------|--------------|-------------|
|                 | mean      | SD        | mean      | SD        | mean       | SD         | mean          | SD        | mean         | SD          |
| <i>ABCC1</i>    | 212347.91 | 120167.83 | 793260.86 | 871703.41 | 287172.96  | 185450.98  | 171007.00     | 105071.00 | 268428.00    | 239633.00   |
| <i>ABCC4</i>    | 17563.24  | 7331.72   | 93064.76  | 106863.99 | 252419.40  | 231728.27  | 64531.10      | 74076.40  | 59001.10     | 47012.40    |
| <i>ABCG2</i>    | 41691.98  | 15412.68  | 26622.47  | 25065.35  | 1329.01    | 1271.83    | 905358.00     | 779787.00 | 299870.00    | 780028.00   |
| <i>SLC10A6</i>  | 524.56    | 137.10    | 4287.98   | 4711.50   | 3841.04    | 3018.53    | 20421.20      | 20447.50  | 32124.90     | 110341.00   |
| <i>SLC22A11</i> | 106.17    | 70.20     | 135.98    | 85.85     | 976.17     | 954.03     | 11375.70      | 9168.96   | 7678.84      | 7745.00     |
| <i>SLC51A</i>   | 14797.83  | 8470.23   | 207015.19 | 295527.05 | 92745.15   | 99959.00   | 44121.50      | 44178.70  | 59825.20     | 55194.40    |
| <i>SLC51B</i>   | 1439.37   | 536.86    | 61868.48  | 96982.06  | 9572.80    | 11705.51   | 180466.00     | 134256.00 | 85590.40     | 107595.00   |
| <i>SLCO1A2</i>  | 338.55    | 202.35    | 11891.72  | 20194.06  | 107.75     | 135.02     | 6724.91       | 16820.90  | 24512.90     | 87127.70    |
| <i>SLCO1B1</i>  | 10.82     | 6.81      | 397.36    | 298.16    | 6500.27    | 7250.01    | 88513.40      | 205123.00 | 85141.20     | 179207.00   |
| <i>SLCO1B3</i>  | 410.02    | 394.39    | 13556.37  | 22706.14  | 8212224.39 | 7316381.75 | 353300.00     | 751143.00 | 3020220.00   | 13262300.00 |
| <i>SLCO1C1</i>  | 32.90     | 20.13     | 1777.63   | 3210.93   | 683.96     | 1307.26    | 3509.41       | 2818.91   | 3803.15      | 4128.28     |
| <i>SLCO2B1</i>  | 1407.00   | 389.01    | 1010.77   | 1238.63   | 142565.28  | 100526.24  | 392533.00     | 285953.00 | 358978.00    | 486884.00   |
| <i>SLCO3A1</i>  | 925.72    | 815.48    | 49.26     | 85.39     | 278.00     | 220.62     | 9883.77       | 14303.70  | 8493.11      | 16459.40    |
| <i>SLCO4A1</i>  | 8896.66   | 5529.25   | 11596.36  | 12879.74  | 346579.01  | 249855.69  | 281831.00     | 366875.00 | 286660.00    | 516142.00   |
| <i>SLCO4C1</i>  | 3466.15   | 852.02    | 408303.85 | 354990.02 | 852.59     | 971.24     | 14510.30      | 15098.10  | 26496.60     | 50860.70    |



|                       |                     |                     |                   |      |                      |                    |                     |                    |      |      |      |
|-----------------------|---------------------|---------------------|-------------------|------|----------------------|--------------------|---------------------|--------------------|------|------|------|
| HEC-1-A 500nM DHEA    | 335.670 nM          | 6016.566 fmol/Mio/h | 59.537 fmol/Mio/h | n.c. | n.c.                 | n.c.               | n.c.                | n.c.               | n.c. | n.c. | n.c. |
| HEC-1-A 500nM DHEA    | 299.632 nM          | 3502.040 fmol/Mio/h | 31.928 fmol/Mio/h | n.c. | n.c.                 | n.c.               | n.c.                | n.c.               | n.c. | n.c. | n.c. |
| HEC-1-A 1000nM DHEA   | 480.195 nM          | 4816.805 fmol/Mio/h | 66.456 fmol/Mio/h | n.c. | n.c.                 | 0.707 fmol/Mio/h   | n.c.                | 0.673 fmol/Mio/h   | n.c. | n.c. | n.c. |
| HEC-1-A 1000nM DHEA   | 527.306 nM          | 5063.847 fmol/Mio/h | 58.499 fmol/Mio/h | n.c. | n.c.                 | n.c.               | n.c.                | 0.966 fmol/Mio/h   | n.c. | n.c. | n.c. |
| HEC-1-A 10nM E1       | n.c.                | n.c.                | n.c.              | n.c. | 7.083 nM             | 8.081 fmol/Mio/h   | 23.469 fmol/Mio/h   | 1.398 fmol/Mio/h   | n.c. | n.c. | n.c. |
| HEC-1-A 10nM E1       | n.c.                | n.c.                | n.c.              | n.c. | 6.789 nM             | 8.859 fmol/Mio/h   | 31.603 fmol/Mio/h   | 1.538 fmol/Mio/h   | n.c. | n.c. | n.c. |
| HEC-1-A 100nM E1      | n.c.                | n.c.                | n.c.              | n.c. | 70.124 nM            | 25.407 fmol/Mio/h  | 259.761 fmol/Mio/h  | 12.216 fmol/Mio/h  | n.c. | n.c. | n.c. |
| HEC-1-A 100nM E1      | n.c.                | n.c.                | n.c.              | n.c. | 71.304 nM            | 34.643 fmol/Mio/h  | 304.473 fmol/Mio/h  | 15.599 fmol/Mio/h  | n.c. | n.c. | n.c. |
| HEC-1-A 500nM E1      | n.c.                | n.c.                | n.c.              | n.c. | 355.688 nM           | 168.685 fmol/Mio/h | 1348.447 fmol/Mio/h | 77.748 fmol/Mio/h  | n.c. | n.c. | n.c. |
| HEC-1-A 500nM E1      | n.c.                | n.c.                | n.c.              | n.c. | 321.471 nM           | 205.188 fmol/Mio/h | 2076.345 fmol/Mio/h | 109.444 fmol/Mio/h | n.c. | n.c. | n.c. |
| HEC-1-A 1000nM E1     | n.c.                | n.c.                | n.c.              | n.c. | 648.344 nM           | 313.068 fmol/Mio/h | 3438.205 fmol/Mio/h | 192.607 fmol/Mio/h | n.c. | n.c. | n.c. |
| HEC-1-A 1000nM E1     | n.c.                | n.c.                | n.c.              | n.c. | 645.325 nM           | 388.869 fmol/Mio/h | 4096.289 fmol/Mio/h | 227.757 fmol/Mio/h | n.c. | n.c. | n.c. |
| HEC-1-A control       | n.c.                | n.c.                | n.c.              | n.c. | n.c.                 | n.c.               | n.c.                | n.c.               | n.c. | n.c. | n.c. |
| HEC-1-A control       | n.c.                | n.c.                | n.c.              | n.c. | n.c.                 | n.c.               | n.c.                | n.c.               | n.c. | n.c. | n.c. |
| HEC-1-A 10nM DHEA-S   | n.c.                | 8.146 nM            | n.c.              | n.c. | n.c.                 | n.c.               | n.c.                | n.c.               | n.c. | n.c. | n.c. |
| HEC-1-A 10nM DHEA-S   | n.c.                | 7.921 nM            | n.c.              | n.c. | n.c.                 | n.c.               | n.c.                | n.c.               | n.c. | n.c. | n.c. |
| HEC-1-A 100nM DHEA-S  | n.c.                | 89.308 nM           | n.c.              | n.c. | n.c.                 | n.c.               | n.c.                | n.c.               | n.c. | n.c. | n.c. |
| HEC-1-A 100nM DHEA-S  | n.c.                | 86.140 nM           | n.c.              | n.c. | n.c.                 | n.c.               | n.c.                | n.c.               | n.c. | n.c. | n.c. |
| HEC-1-A 500nM DHEA-S  | n.c.                | 449.489 nM          | n.c.              | n.c. | n.c.                 | n.c.               | n.c.                | n.c.               | n.c. | n.c. | n.c. |
| HEC-1-A 500nM DHEA-S  | n.c.                | 432.201 nM          | n.c.              | n.c. | n.c.                 | n.c.               | n.c.                | n.c.               | n.c. | n.c. | n.c. |
| HEC-1-A 1000nM DHEA-S | 793.913 fmol/Mio/h  | 673.400 nM          | n.c.              | n.c. | n.c.                 | n.c.               | n.c.                | n.c.               | n.c. | n.c. | n.c. |
| HEC-1-A 1000nM DHEA-S | 1302.654 fmol/Mio/h | 607.171 nM          | n.c.              | n.c. | n.c.                 | n.c.               | n.c.                | n.c.               | n.c. | n.c. | n.c. |
| HEC-1-A 10nM E1-S     | n.c.                | n.c.                | n.c.              | n.c. | 31.455 fmol/Mio/h    | 5.997 nM           | n.c.                | 0.592 fmol/Mio/h   | n.c. | n.c. | n.c. |
| HEC-1-A 10nM E1-S     | n.c.                | n.c.                | n.c.              | n.c. | 38.320 fmol/Mio/h    | 7.783 nM           | n.c.                | 0.771 fmol/Mio/h   | n.c. | n.c. | n.c. |
| HEC-1-A 100nM E1-S    | n.c.                | n.c.                | n.c.              | n.c. | 345.704 fmol/Mio/h   | 64.799 nM          | 53.507 fmol/Mio/h   | 4.569 fmol/Mio/h   | n.c. | n.c. | n.c. |
| HEC-1-A 100nM E1-S    | n.c.                | n.c.                | n.c.              | n.c. | 300.360 fmol/Mio/h   | 65.131 nM          | 45.295 fmol/Mio/h   | 4.082 fmol/Mio/h   | n.c. | n.c. | n.c. |
| HEC-1-A 500nM E1-S    | n.c.                | n.c.                | n.c.              | n.c. | 1757.155 fmol/Mio/h  | 323.986 nM         | 252.669 fmol/Mio/h  | 20.533 fmol/Mio/h  | n.c. | n.c. | n.c. |
| HEC-1-A 500nM E1-S    | n.c.                | n.c.                | n.c.              | n.c. | 1855.583 fmol/Mio/h  | 419.430 nM         | 257.309 fmol/Mio/h  | 43.819 fmol/Mio/h  | n.c. | n.c. | n.c. |
| HEC-1-A 1000nM E1-S   | n.c.                | n.c.                | n.c.              | n.c. | 12910.448 fmol/Mio/h | 388.136 nM         | 2100.170 fmol/Mio/h | 74.554 fmol/Mio/h  | n.c. | n.c. | n.c. |

n.c. – not calculable due to levels below the limit of detection or below the limit of quantification.

**Table S4.** Results of immunohistochemistry presented as scores.

| Tissue sample | IHC scores    |             |                     |                   |                 |               |
|---------------|---------------|-------------|---------------------|-------------------|-----------------|---------------|
|               | ABCG2 control | ABCG2 tumor | OST $\beta$ control | OST $\beta$ tumor | OATP1B3 control | OATP1B3 tumor |
| 2             | NA            | 100         | NA                  | 60                | NA              | 45            |
| 3             | 100           | 100         | 100                 | 90                | 135             | 90            |
| 6             | NA            | 90          | NA                  | 80                | NA              | 135           |
| 7             | NA            | 100         | NA                  | 20                | NA              | NA            |
| 9             | 100           | 100         | 150                 | 75                | 180             | 225           |
| 10            | 100           | 100         | 100                 | 95                | 135             | 180           |
| 11            | NA            | 100         | NA                  | 130               | NA              | 158           |
| 14            | NA            | 100         | NA                  | 70                | NA              | 180           |
| 15            | NA            | 100         | NA                  | 8                 | NA              | 135           |
| 16            | NA            | 100         | NA                  | 98                | NA              | 135           |
| 18            | NA            | 90          | NA                  | 8                 | NA              | 45            |
| 19            | 100           | 70          | 100                 | 20                | 135             | 60            |
| 20            | NA            | 60          | NA                  | 50                | NA              | 43            |
| 21            | NA            | 100         | NA                  | 85                | NA              | 180           |
| 22            | 100           | NA          | 100                 | NA                | 135             | NA            |
| 23            | NA            | 78          | NA                  | 48                | NA              | 88            |
| 24            | NA            | 90          | NA                  | 14                | NA              | 53            |
| 25            | 100           | 50          | 100                 | 60                | 180             | 135           |
| 26            | 100           | 100         | 100                 | 23                | 135             | 90            |
| 30            | NA            | 90          | NA                  | 0                 | NA              | 40            |
| 31            | NA            | 85          | NA                  | 55                | NA              | 113           |
| 33            | NA            | 100         | NA                  | 88                | NA              | 180           |
| 34            | NA            | 100         | NA                  | 65                | NA              | 40            |
| 35            | 100           | 100         | 100                 | 85                | 135             | 50            |
| 38            | 100           | 98          | 100                 | 30                | 180             | 180           |
| 39            | NA            | 100         | NA                  | 98                | NA              | 40            |
| 40            | NA            | 100         | NA                  | 95                | NA              | 135           |
| 44            | 100           | NA          | 100                 | NA                | 180             | NA            |
| 46            | 100           | 45          | 100                 | 80                | 135             | 135           |
| 47            | 100           | 95          | 98                  | 80                | 113             | 103           |
| 48            | NA            | 100         | NA                  | 120               | NA              | 135           |
| 49            | 100           | 35          | 100                 | 90                | 135             | 90            |
| 50            | NA            | 90          | NA                  | 80                | NA              | 90            |
| 51            | NA            | 70          | NA                  | 40                | NA              | 160           |
| 52            | NA            | 83          | NA                  | 82                | NA              | 68            |
| 53            | 100           | NA          | 100                 | NA                | 180             | NA            |
| 54            | 100           | 55          | 100                 | 35                | 158             | 33            |
| 55            | NA            | 21          | NA                  | 7                 | NA              | 88            |
| 56            | 100           | 50          | 100                 | 80                | 135             | 90            |
| 57            | 100           | 100         | 100                 | 90                | 68              | 90            |
| 58            | 100           | NA          | 100                 | NA                | 158             | NA            |
| 60            | 100           | NA          | 100                 | NA                | 135             | NA            |
| 61            | 100           | 15          | 100                 | 20                | 135             | 10            |
| 62            | 100           | 100         | 100                 | 100               | 158             | 135           |
| 63            | 100           | 98          | 100                 | 80                | 135             | 10            |
| 64            | 100           | 75          | 100                 | 70                | 135             | 30            |
| 65            | 100           | NA          | 100                 | NA                | 113             | NA            |
| 66            | NA            | 90          | NA                  | 80                | NA              | 90            |
| 68            | NA            | 100         | NA                  | 90                | NA              | 90            |
| 69            | NA            | 80          | NA                  | 80                | NA              | 30            |
| 70            | 100           | 75          | 100                 | 0                 | 135             | 180           |
| 71            | 100           | 85          | 100                 | 13                | 180             | 180           |

NA – data not available.
